# Supplementary material for: Design and preparation of bio-based dielectric elastomer with polar and plasticized side chains
Source: Royal Society of Chemistry journal article supplement (doi:10.1039/c5ra06576c), 2015-01-01
Supplement: c5ra06576c1.pdf [file c5ra06576c1.pdf]

**Design and Preparation of Bio-based Dielectric Elastomer with Polar and  
Plasticized Side Chains**

Weiwei Lei,<sup>a</sup> Runguo Wang,<sup>a</sup> Dan Yang,<sup>d</sup> Guanyi Hou,<sup>a</sup> Xinxin Zhou,<sup>a</sup> He Qiao,<sup>a</sup>

Wencai Wang,<sup>a</sup> Ming Tian,<sup>a</sup> Liqun Zhang<sup>\*abc</sup>

<sup>a</sup>State Key Laboratory for Organic–Inorganic Composites, Beijing University of Chemical Technology, Beijing 100029, China.

E-mail: zhanglq@mail.buct.edu.cn; Fax: +86-10-64456158; Tel: +86-10-64443413

<sup>b</sup>Key Laboratory of Beijing City for Preparation and Processing of Novel Polymer Materials, Beijing University of Chemical Technology, Beijing 100029, China.

<sup>c</sup>Beijing Engineering Research Center of Advanced Elastomers, Beijing University of Chemical Technology, Beijing 100029, China.

<sup>d</sup>Beijing Institute of Petrochemical Technology, Beijing 102600, China.

**Table S1.** Glass transition temperature ( $T_g$ ) of poly (di-*n*-alkyl itaconates) (PDAI) <sup>1,2</sup>

| PDAI                         | $T_g/^\circ\text{C}$ |
|------------------------------|----------------------|
| Dimethyl (PDMI)              | 95                   |
| Diethyl (PDEI)               | 58                   |
| Di- <i>n</i> -propyl (PDPrI) | 34                   |
| Di- <i>n</i> -butyl (PDBI)   | 12                   |
| Di- <i>n</i> -pentyl (PDPeI) | 5                    |
| Di- <i>n</i> -hexyl (PDHxI)  | -18                  |
| Di- <i>n</i> -heptyl (PDHpI) | -23                  |
| Di- <i>n</i> -octyl (PDOI)   | -20                  |
| Di- <i>n</i> -nonyl (PDNI)   | -11                  |
| Di- <i>n</i> -decyl (PDDI)   | -3                   |

In Table S1, the  $T_g$  of PDAI decrease first as the side chains increase in length from methyl to heptyl. PDAI bearing the flexible pendant groups are similar to the small-molecular additives by pushing the chains further apart and thereby producing a change in  $T_g$ . The  $T_g$  increasing is observed from heptyl to decyl for the developing order tendency of the long side chains. Considering the polarity of di-*n*-alkyl itaconates also, di-*n*-butyl itaconate was used to synthesize the dielectric elastomer. Furthermore, bio butanol is a promising biofuel product in the word.

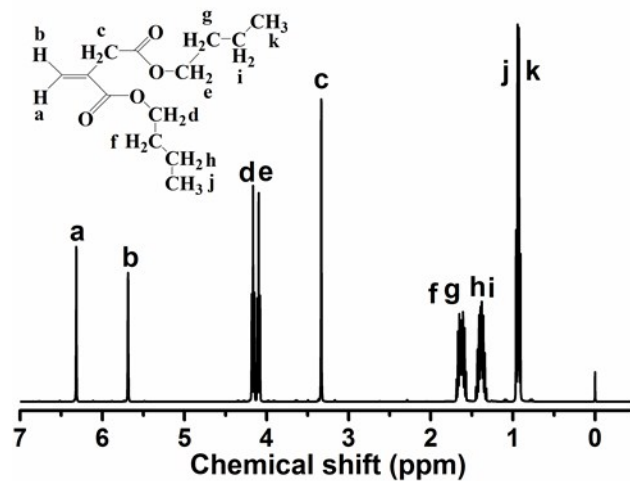

**Figure S1.** <sup>1</sup>H NMR spectrum of di-*n*-butyl itaconate (DBI)

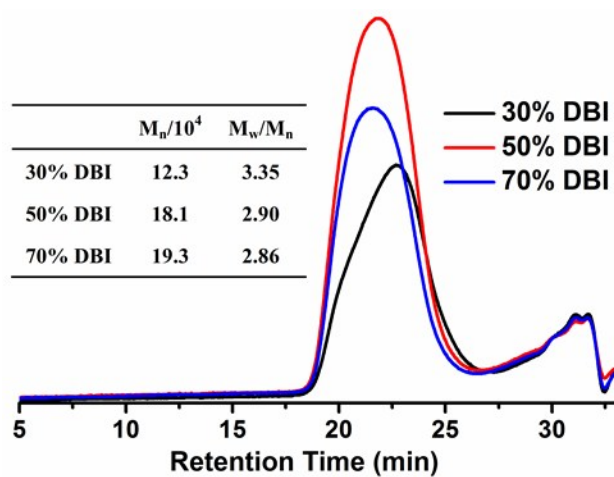

**Figure S2.** GPC traces for PDBII with different itaconate to isoprene feed ratios. (DBI: di-*n*-butyl itaconate, i.e., 30% DBI means 30 wt % DBI in the feed. In inserted table,  $M_n$ : number-average molecular weight,  $M_w/M_n$ : polydispersity ratio (weight average molecular weight/number-average molecular weight), by GPC (polystyrene calibration))

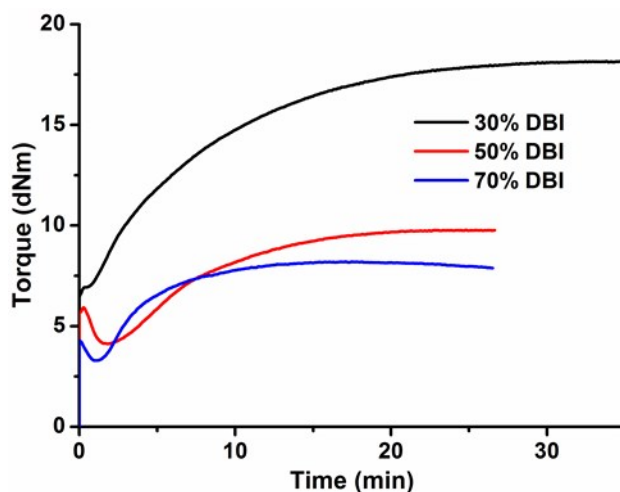

**Figure S3.** The curing curves of PDBII with different content of DBI in the feed. (70% DBI stands for 70% DBI in the feed.)

**Table S2.** The optimum cure time of PDBII with different content of DBI in the feed. (70% DBI stands for 70% DBI in the feed.)

| Formulations | T90 (min:s) |
|--------------|-------------|
| 70% DBI      | 9:36        |
| 50% DBI      | 14:52       |
| 30% DBI      | 17:39       |

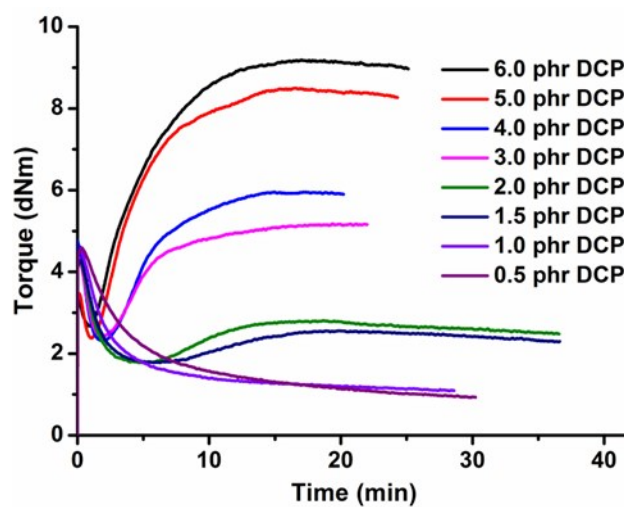

**Figure S4.** The curing curves of PDBII with 70% di-*n*-butyl itaconate in the feed crosslinked by

different content of DCP.

**Table S3.** The optimum cure time of PDBII with 70% di-*n*-butyl itaconate in the feed crosslinked by different content of DCP.

| Formulations | T90 (min:s) |
|--------------|-------------|
| 0.5 phr DCP  | -           |
| 1.0 phr DCP  | -           |
| 1.5 phr DCP  | 16:14       |
| 2.0 phr DCP  | 13:25       |
| 3.0 phr DCP  | 11:11       |
| 4.0 phr DCP  | 10:33       |
| 5.0 phr DCP  | 9:58        |
| 6.0 phr DCP  | 9:56        |

**Table S4.** Curing characteristics and elastic modulus of BaTiO<sub>3</sub> filled PDBII with 70% di-*n*-butyl itaconate in the feed.

| Items                  | BaTiO <sub>3</sub> /phr |       |       |       |       |       |
|------------------------|-------------------------|-------|-------|-------|-------|-------|
|                        | 0                       | 10    | 30    | 50    | 70    | 90    |
| S <sub>max</sub> (dNm) | 8.50                    | 8.05  | 8.60  | 10.81 | 11.27 | 9.82  |
| S <sub>min</sub> (dNm) | 2.38                    | 1.51  | 1.57  | 1.67  | 1.72  | 1.72  |
| ΔS(dNm)                | 6.12                    | 6.54  | 7.03  | 9.14  | 9.55  | 8.10  |
| Elastic modulus/MPa    | 0.420                   | 0.146 | 0.180 | 0.214 | 0.290 | 0.158 |
| T90 (min:s)            | 8:49                    | 12:32 | 12:30 | 10:41 | 10:21 | 11:47 |

**Table S5.** Comparing actuation strain of PDBII elastomer with other dielectric elastomers.

| Material                     | Prestrain<br>(x,y) (%) | Area strain <sup>a</sup><br>(%) | Field<br>Strength <sup>a</sup><br>(kV/mm) | Ref. |
|------------------------------|------------------------|---------------------------------|-------------------------------------------|------|
| PANI-g-PolyCuPc-g-PU         | 0, 0                   | 7                               | 23                                        | 3    |
| 23 wt %PANI/P(VDF-TrFE-CTFE) | 0, 0                   | 1.5                             | 9.5                                       | 4    |
| PANI@PDVB/PDMS               | 0, 0                   | 12                              | 54                                        | 5    |
| 14PANI/15PolyCuPc/85PU       | 0, 0                   | 9.3                             | 20                                        | 3    |
| SEBS-MA grafted PANI         | 0, 0                   | 1.4                             | 27                                        | 6    |
| NBR/TiO <sub>2</sub> /DOP    | 0, 0                   | 3.04                            | 20                                        | 6    |
| 5 wt % CNTs/PDMS             | 0, 0                   | 4.4                             | 1.5                                       | 7    |
| P(VDF-TrFE)/40 wt %CuPc      | 0, 0                   | 1.91                            | 13                                        | 8    |
| Polyester elastomer          | 0, 0                   | 11.9                            | 15.6                                      | 9    |
| PDBII                        | 0,0                    | 14                              | 20                                        |      |
|                              | 0,0                    | 20                              | 30                                        |      |
|                              | 0,0                    | 25                              | 40                                        |      |

a. Estimated from graphical data in cited reference

## References

- 1 J. Cowie, S. Henshall and I. McEwen, *Polymer*, 1977, **18**, 612-616.
- 2 J. Cowie, Z. Haq, I. McEwen and J. Velickovic, *Polymer*, 1981, **22**, 327-332.
- 3 C. Huang and Q. M. Zhang, *Adv. Mater.*, 2005, **17**, 1153-1158.
- 4 C. Huang and Q. M. Zhang, *Adv. Funct. Mater.*, 2004, **14**, 501-506.
- 5 M. Molberg, D. Crespy, P. Rupper, F. Nuesch, J. A. E. Manson, C. Loewe and D. M. Opris, *Adv. Funct. Mater.*, 2010, **20**, 3280-3291.
- 6 H. Stoyanov, M. Kolloosche, D. N. McCarthy and G. Kofod, *J. Mater. Chem.*, 2010, **20**, 7558-7564.
- 7 L. Z. Chen, C. H. Liu, C. H. Hu and S. S. Fan, *Appl. Phys. Lett.*, 2008, **92**, 263104-263106.
- 8 Q. M. Zhang, H. F. Li, M. Poh, F. Xia, Z. Y. Cheng, H. S. Xu and C. Huang, *Nature*, 2002, **419**, 284-287.
- 9 D. Yang, M. Tian, H. Kang, Y. Dong, H. Liu, Y. Yu and L. Zhang, *Mater. Lett.*, 2012, **76**, 229-232.
